# Supplementary material for: ALKBH5 regulates cardiomyocyte proliferation and heart regeneration by demethylating the mRNA of YTHDF1
Source: PubMed Central journal article supplement (PMC7806463; doi:10.7150/thno.47354), 2021-01-01
Supplement: thnov11p3000s1.pdf [file thnov11p3000s1.pdf]

# Supplementary Materials

**Figure S1**

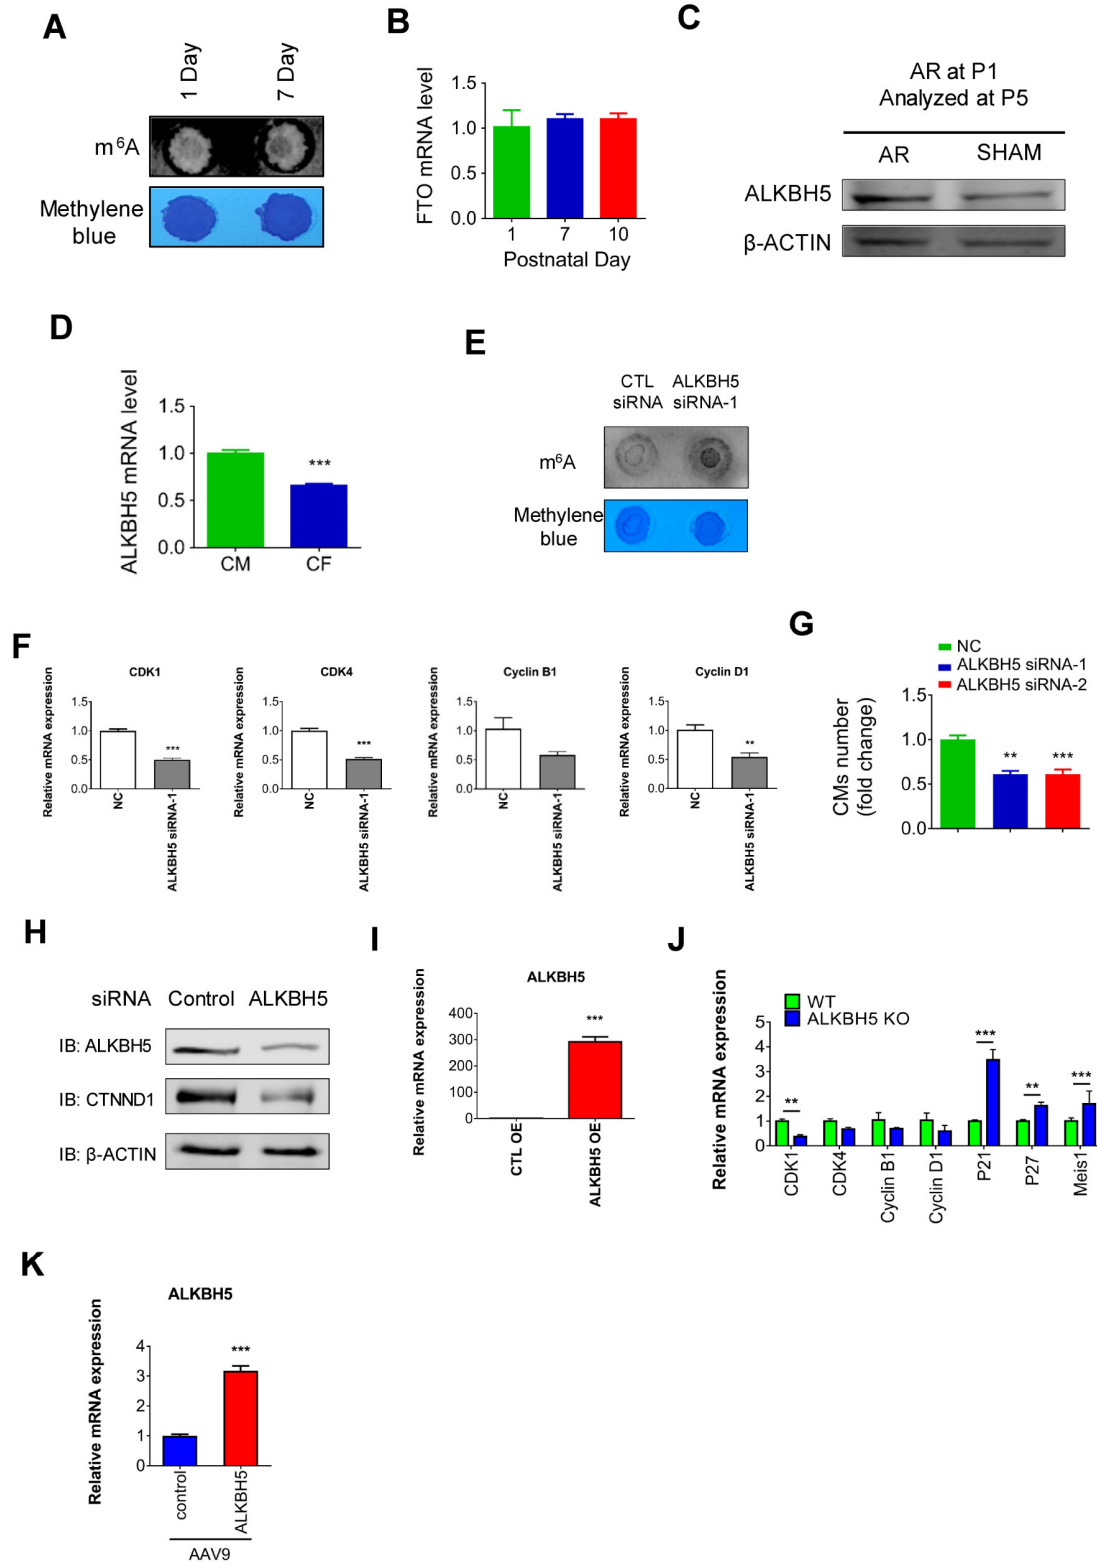

**Figure S1. ALKBH5 regulates cardiomyocytes proliferation.** (A) m<sup>6</sup>A dot blot assay of mRNAs isolated from P1 and P7 hearts. (B) RT-qPCR analysis of FTO in hearts from P1, P7 and P10 mice (n = 4). (C) Western blot analysis of ALKBH5 of hearts harvested 4 days after an AR operation on a 1-day-old mice. (D) RT-qPCR analysis of ALKBH5 expression in cultured P1 cardiomyocytes (CM) and cardiac fibroblasts (CF). (\*\*\*p < 0.001, n = 4). (E) m<sup>6</sup>A dot blot assay of control and ALKBH5 siRNA-1 cells. (F) RT-qPCR analysis of CDK1, CDK4, Cyclin B1 and Cyclin D1 in cultured P1 cardiomyocytes transfected with control siRNA or ALKBH5 siRNA (\*\*p < 0.01, \*\*\*p < 0.001, n = 4). (G) Quantification of the number of myocytes per microscopic field from control or ALKBH5-siRNA treated cells (n = 4). (H) Western blot analysis of ALKBH5 and CTNND1 in cultured P1 cardiomyocytes transfected with control or ALKBH5 siRNA. (I) RT-qPCR analysis of ALKBH5 in cultured P1 cardiomyocytes transfected with control ALKBH5 expressing plasmid (\*\*\*p < 0.001, n = 4). (J) RT-qPCR analysis of cell proliferation related genes in hearts from WT or ALKBH5 KO mice (\*\*p < 0.01, \*\*\*p < 0.001, n = 4). (K) RT-qPCR analysis of ALKBH5 in hearts from P28 mice after injected with AAV9-ALKBH5 or AAV9-control at P7 (\*\*\*p < 0.001, n = 4).

**Figure S2**

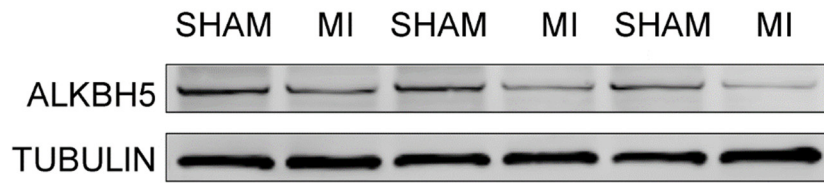

**Figure S2. Decreased expression of ALKBH5 after MI.** Western blot analysis of ALKBH5 in hearts from mice at 5 days after MI.

**Figure S3**

**A**

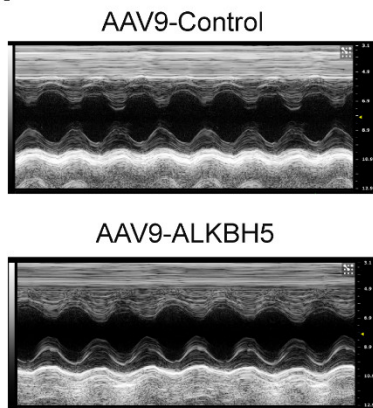

**B**

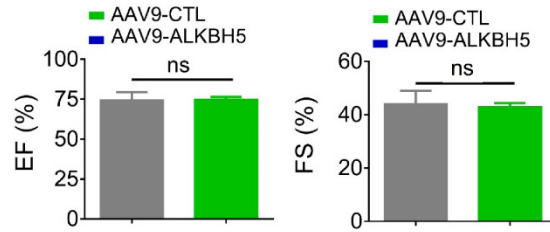

**C**

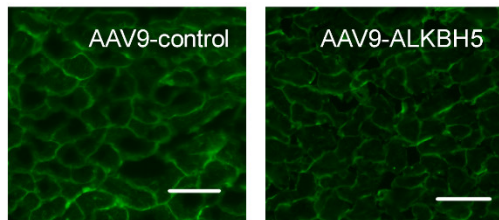

**D**

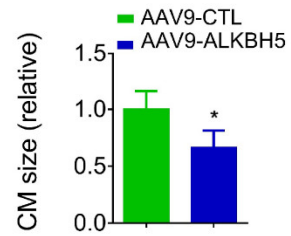

**E**

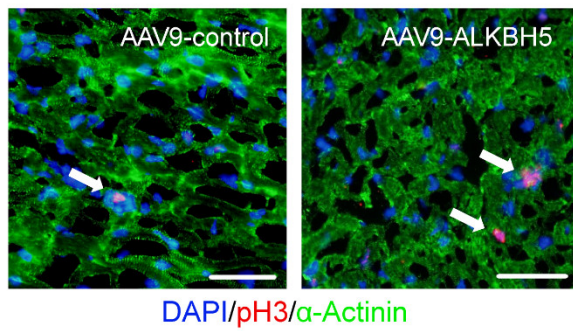

**F**

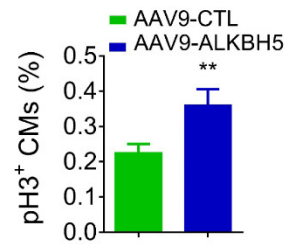

**Figure S3. ALKBH5 promotes cardiomyocyte proliferation in adult (8-weeks old) mice.** (A, B) Cardiac function of adult mice after transfection with AAV9-CTL or AAV9-ALKBH5 for 21 days. n = 6. (C, D) Wheat germ agglutinin (WGA) staining and quantification of adult AAV9-ALKBH5 and AAV9-control mice hearts (\*P < 0.05, n = 6). (E, F) PH3 immunofluorescence staining in adult AAV9-ALKBH5 and AAV9-control hearts and quantification of pH3-positive CMs (7953 CMs in the AAV9-control group and 10078 CMs in the AAV9-ALKBH5 group). \*\*P < 0.01.

**Figure S4**

**A**

| GeneSymbol | OE(Methylation_level) | CTL(Methylation_level) | description                                                                      |
|------------|-----------------------|------------------------|----------------------------------------------------------------------------------|
| YAP1       | 0.859338627           | 0.881984701            | Yes associated protein 1 [Source:HGNC Symbol;Acc:HGNC:16262]                     |
| YTHDF1     | 0.291457145           | 0.580011436            | YTH N6-methyladenosine RNA binding protein 1 [Source:HGNC Symbol;Acc:HGNC:15867] |

**B**

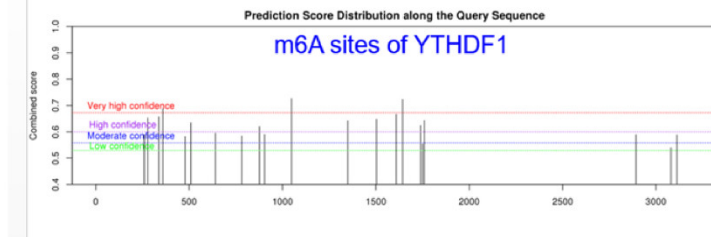

**C**

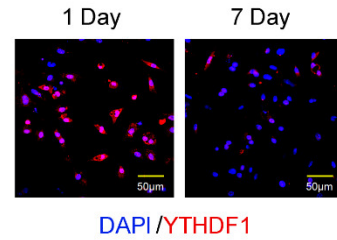

**D**

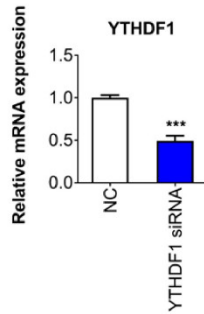

**E**

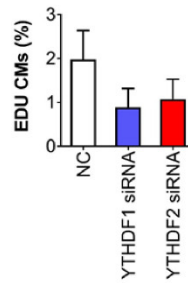

**F**

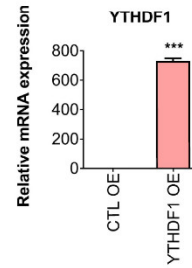

**G**

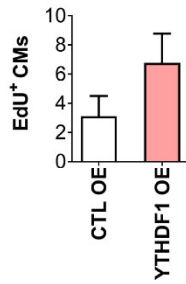

**H**

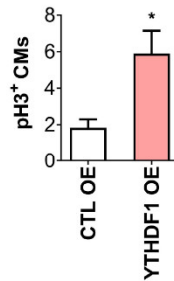

**I**

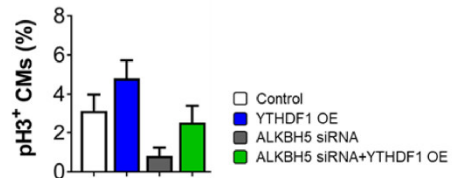

**J**

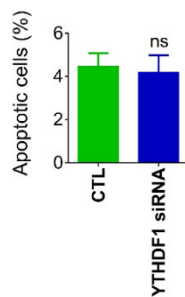

**Figure S4. YTHDF1 promotes cardiomyocyte proliferation.** (A) The methylation level for YAP and YTHDF1 in m<sup>6</sup>A transcriptomic array. (B) Potential sites for m<sup>6</sup>A modification in the sequence of YTHDF1 gene. (C) Immunostaining of YTHDF1 in cardiomyocytes isolated from P1 and P7 mice. Scale bar, 50  $\mu$ m. (D) RT-qPCR analysis of YTHDF1 in cultured P1 cardiomyocytes transfected with control or YTHDF1 siRNA. \*\*\*p < 0.001, n = 4. (E) Cardiomyocytes isolated from P1 mice were transfected with YTHDF1 or YTHDF2 siRNAs and immunostained against EdU. (F) RT-qPCR analysis of YTHDF1 in cultured P1 cardiomyocytes transfected with control or YTHDF1 expressing plasmid. \*\*\*p < 0.001, n = 4. (G, H) Cardiomyocytes isolated from P1 mice were transfected with control plasmid or YTHDF1 expressing plasmid and immunostained against EdU or pH3. \*P < 0.05. (I) Neonatal P1 cardiomyocytes in control, YTHDF1 OE, ALKBH5 siRNA and ALKBH5 siRNA+YTHDF1 OE group were immunostained against pH3. (J) The effect of YTHDF1 KD on apoptosis of P1 cardiomyocytes as determined by TUNEL staining.

Figure S5

**A**

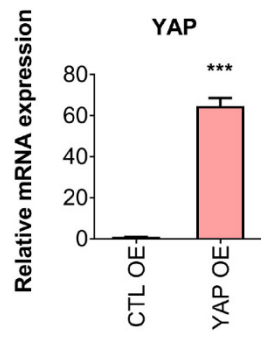

**B**

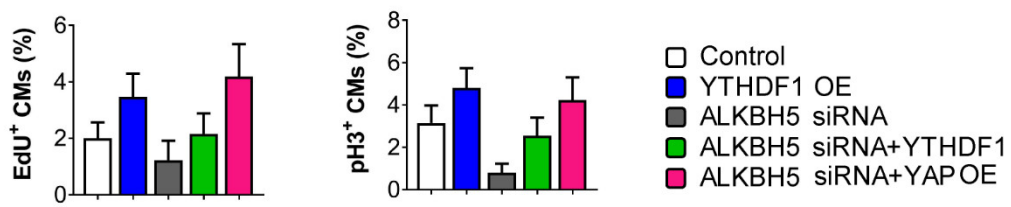



**Figure S5.** (A) RT-qPCR analysis of YAP in cultured P1 cardiomyocytes transfected with control or YAP expressing plasmid. (B) Cardiomyocytes isolated from P1 mice were transfected with YTHDF1 OE, ALKBH5 siRNA, ALKBH5 siRNA+YTHDF1 OE, ALKBH5 siRNA+YAP OE and immunostained against EdU or pH3.

**Figure S6**

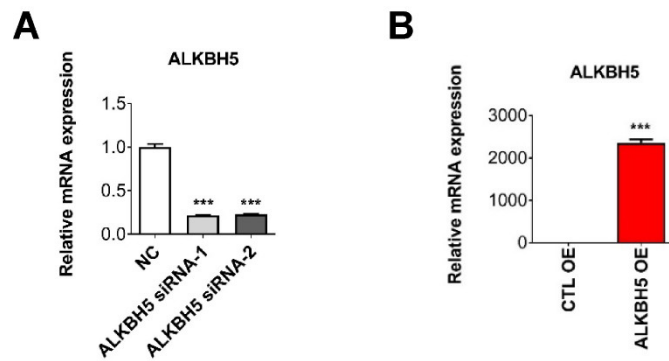

**Figure S6.** (A) RT-qPCR analysis of ALKBH5 in hiPSC-CMs transfected with control siRNA or ALKBH5 siRNAs (\*\**p* < 0.001, *n* = 4). (B) RT-qPCR analysis of ALKBH5 mRNA expression in hiPSC-CMs transfected with control plasmid or ALKBH5 plasmid (\*\**p* < 0.001, *n* = 4).

## Supplementary Tables

**Table S1. Primers used in RT-qPCR.**

| Gene           | Forward 5'-3'           | Reverse 5'-3'           |
|----------------|-------------------------|-------------------------|
| <b>RT-qPCR</b> |                         |                         |
| mALKBH5        | GTGGGACCTTTTGGGTTTCAG   | GCATACGGCCTCAGGACATTA   |
| mYAP           | ACCCTCGTTTTGCCATGAAC    | TGTGCTGGGATTGATATTCCGTA |
| mCDK1          | GTCCGTCGTAACCTGTTGAG    | TGACTATATTTGGATGTCTGAAG |
| mCDK4          | AGTCAGTGGTGCCAGAGAT     | AGATTGCTTATGTGGGTTA     |
| mCyclin B1     | TATGAGCCTCGAATCCACATAGT | CCTCGTTCTGATAAGCAGTCAC  |
| mCyclin D1     | AGCCAGCTGCAGTGCTGTAC    | CTGGTGGTGCCCGTTTTG;     |
| mYTHDF1        | TGGGAGTGGACATTTCTGTG    | TTCTAAGGGCACCTCCTGTG    |
| mYTHDF2        | CAGGCATCAGTAGGGCAACA    | TTATGACCGAACCCACTGCC    |
| 18s            | CCTGGATACCGCAGCTAGGA    | GCGGCGCAATACGAATGCC     |
| hALKBH5        | GGCCGTATGCAGTGAGTGATT   | TGTCCGTGTCCTTCTTTAGCG   |
| hYTHDF1        | ACCTGTCCAGCTATTACCCG    | TGGTGAGGTATGGAATCGGAG   |
| hYAP           | TGCGTAGCCAGTTACCA       | GGTGCCACTGTTAAGGA       |

**Table S2. Antibodies and other reagents used in this study.**

| REAGENT or RESOURCE              | SOURCE                 | IDENTIFIER  |
|----------------------------------|------------------------|-------------|
| Primary antibodies               |                        |             |
| Anti-phospho Histone H3          | Millipore              | 06-570      |
| Anti-Aurora B                    | Abcam                  | Ab2254      |
| Anti-Tubulin alpha Ab            | Affinity               | AF7010      |
| Anti-YAP                         | Santa Cruz             | sc-101199   |
| Anti-YTHDF1                      | Proteintech            | 17479-1-AP  |
| Anti-m <sup>6</sup> A            | Synaptic System        | No.202 003  |
| Anti-Sarcomeric Alpha Actinin    | Abcam                  | ab9465      |
| Anti- $\beta$ -actin             | ZHONG SHAN             | TA-09       |
| Anti-ALKBH5                      | Millipore              | ABE547      |
| normal mouse IgG                 | Millipore              | AP124P      |
| normal rabbit IgG                | Millipore              | AP132P      |
| Secondary antibodies             |                        |             |
| IRDye® 800CW Goat anti-Mouse     | LI-COR                 | 925-32210   |
| IRDye® 800CW Goat anti-Rabbit    | LI-COR                 | 925-32211   |
| Alexa Fluor 488 Goat Anti-Mouse  | Abcam                  | ab150113    |
| Alexa Fluor 594 Goat Anti-Rabbit | Abcam                  | Ab150080    |
| Chemicals and Peptides           |                        |             |
| Essential 8 medium               | STEMCELL<br>Technology | 05990       |
| Accutase                         | Sigma-Aldrich          | A6964       |
| Matrigel matrix                  | Corning                | 354277      |
| ROCK inhibitor                   | MedChemExpress         | HY-10319    |
| EDTA                             | Cellapy                | CA3001500   |
| CHIR-99021                       | MedChemExpress         | HY-10182    |
| B-27™ Supplement (50X)           | Thermo Fisher          | 17504044    |
| B-27™ Supplement, minus insulin  | Thermo Fisher          | A1895601    |
| Wnt-C59                          | MedChemExpress         | HY-15659    |
| RPMI 1640 Medium                 | Thermo Fisher          | 22400105    |
| Verteporfin                      | Simga                  | SML0534     |
| Lipofectamine® RNAiMAX           | Invitrogen             | 13778-150   |
| ViaFect™ Transfection Reagent    | Promega                | E4982       |
| Actinomycin D                    | MCE                    | HY-17559    |
| Foetal Bovine Serum              | BI                     | 04-001-1ACS |
| DMEM                             | CORNING                | 10-013CVRC  |

**Table S3. Target sequences of siRNAs used for specific gene knockdown experiments.**

|                       | siRNA Oligonucleotides |                               |
|-----------------------|------------------------|-------------------------------|
| Negative control-siRN | Sense                  | 5'-UUCUCCGAACGUGUCACGUTT-3'   |
|                       | Antisense              | 5'-ACGUGACACGUUCGGAGAATT-3'   |
| hALKBH5 siRNA-1       | Sense                  | 5'-CUGCGCAACAAGUACUUCUTT-3'   |
|                       | Antisense              | 5'-AGAAGUACUUGUUGCGCAGTT-3'   |
| hALKBH5 siRNA-2       | Sense                  | 5'-GGAUAUGCUGCUGAUGAAATT-3'   |
|                       | Antisense              | 5'-UUUCAUCAGCAGCAUAUCCTT-3'   |
| mALKBH5 siRNA-1       | Sense                  | 5'-GAGAACUAUUGGCGCAAUUTT-3'   |
|                       | Antisense              | 5'-AUUUGCGCCAAUAGUUCUCTT-3'   |
| mALKBH5 siRNA-2       | Sense                  | 5'-CUGCGCAACAAGUACUUCUTT-3'   |
|                       | Antisense              | 5'-AGAAGUACUUGUUGCGCAGTT-3'   |
| mALKBH5 siRNA-3       | Sense                  | 5'-GCGACUACGAGGAGCAUCATT-3'   |
|                       | Antisense              | 5'-UGAUGCUCUCGUAGUCGCTT-3'    |
| mYTHDF1 siRNA         | Sense                  | 5'-GAUCCUACCUGUCCAGUUACTT-3'  |
|                       | Antisense              | 5'-GUAACUGGACAGGUAAGGAUCTT-3' |
| mYTHDF2 siRNA         | Sense                  | 5'-GUAACUGGACAGGUAAGGAUCTT-3' |
|                       | Antisense              | 5'-UAUAUCCAGAGCUUUGAGUTT-3'   |

**Table S4. Cardiac function measured by echocardiography.**

Cardiac function measured by echocardiography of WT and ALKBH5 KO mice.

|                   | <b>WT</b>  | <b>ALKBH5-KO</b> |
|-------------------|------------|------------------|
| <b>IVSd (mm)</b>  | 0.89±0.02  | 0.98±0.08        |
| <b>IVSs (mm)</b>  | 1.28±0.10  | 1.45±0.09        |
| <b>LVIDd (mm)</b> | 2.08±0.20  | 2.08±0.21        |
| <b>LVIDs (mm)</b> | 0.88±0.09  | 0.98±0.13        |
| <b>LVPWd (mm)</b> | 1.13±0.19  | 1.08±0.14        |
| <b>LVPWs (mm)</b> | 1.57±0.20  | 1.48±0.14        |
| <b>EF (%)</b>     | 89.13±1.72 | 85.11±3.11       |
| <b>FS (%)</b>     | 57.45±2.88 | 52.74±3.73       |
